1 Host genetic variation in mucosal immunity pathways influences the upper airway microbiome  
2 Catherine Igartua<sup>1</sup>, Emily R Davenport<sup>1,2</sup>, Yoav Gilad<sup>1,3</sup>, Dan Nicolae<sup>1,3,4</sup>, Jayant Pinto<sup>5\*</sup>, Carole  
3 Ober<sup>1\*</sup>

4

5 <sup>1</sup>Department of Human Genetics, University of Chicago, Chicago, IL, 60637

6 <sup>2</sup>Department of Molecular Biology & Genetics, Cornell University, Ithaca, NY, 14853

7 <sup>3</sup>Department of Medicine, University of Chicago, Chicago, IL, 60637

8 <sup>4</sup>Department of Statistics, University of Chicago, Chicago, IL, 60637

9 <sup>5</sup>Section of Otolaryngology-Head and Neck Surgery, Department of Surgery, University of  
10 Chicago, Chicago, IL, 60637

11

12 \*These authors contributed equally

13 **ABSTRACT**

14 The degree to which host genetic variation can modulate microbial communities in humans  
15 remains an open question. Here we performed a genetic mapping study of the microbiome in  
16 two accessible upper airway sites, the nasopharynx and the nasal vestibule, during two seasons  
17 in 144 adult members of a founder population of European descent. We estimated the relative  
18 abundances (RAs) of genus level bacteria from 16S rRNA gene sequences and examined  
19 associations with 148,653 genetic variants (linkage disequilibrium [LD]  $r^2 < 0.5$ ) selected from  
20 among all common variants discovered in genome sequences in this population. We identified  
21 37 microbiome quantitative trait loci (mbQTLs) that showed evidence of association with the  
22 RAs of 22 genera ( $q < 0.05$ ), and were enriched for genes in mucosal immunity pathways. The  
23 most significant association was between the RA of *Dermacoccus* (phylum Actinobacteria) and  
24 a variant 8kb upstream of *TINCR* (rs117042385;  $p = 1.61 \times 10^{-8}$ ;  $q = 0.002$ ), a long non-coding  
25 RNA that binds to peptidoglycan recognition protein 3 (*PGLYRP3*) mRNA, a gene encoding a  
26 known antimicrobial protein. A second association was between a missense variant in  
27 *PGLYRP4* (rs3006458) and the RA of an unclassified genus of family Micrococcaceae (phylum  
28 Actinobacteria) ( $p = 5.10 \times 10^{-7}$ ;  $q = 0.032$ ). Our findings provide evidence of host genetic  
29 influences on upper airway microbial composition in humans, and implicate mucosal immunity  
30 genes in this relationship.

## 31 INTRODUCTION

32           Diverse populations of microorganisms inhabit nearly every surface of the human body  
33 and these complex assemblies of microbes reflect host-microbe and microbe-microbe  
34 interactions. Collectively, these microorganisms constitute the human microbiome (Human  
35 Microbiome Project Consortium 2012). Under healthy conditions, the relationship between  
36 microbes and the host is symbiotic with many physiologic benefits to the host (Nicholson et al.  
37 2012). Imbalances or changes in the composition of bacterial communities can shift this  
38 relationship from symbiotic to pathogenic, a condition known as dysbiosis, which has been  
39 implicated in a variety of diseases (Chow et al. 2010). For example, altered composition of  
40 airway microbiota has been linked to important respiratory diseases such as sinusitis (Boase et  
41 al. 2013), chronic obstructive pulmonary disease (COPD) (Pragman et al. 2012) and asthma  
42 (Hilty et al. 2010; Huang et al. 2011; Denner et al. 2015). Similar to the traits it influences, the  
43 microbiome itself can be considered a complex phenotype with environmental and genetic  
44 factors contributing to its composition (Marsland and Gollwitzer 2014). Understanding how host  
45 genetic variation shapes the microbiome, and how the microbiome ultimately functions to  
46 modulate host immunity are fundamental questions that are central to fully characterizing the  
47 architecture of many common diseases that occur at mucosal surfaces, including those  
48 involving the airway.

49           Although knowledge of the airway microbiome lags behind that of the gut, important  
50 characteristics of the microbial communities in the airway are beginning to emerge. Similar to  
51 the gut, the community structure of an individual's airway microbiome is established early in life  
52 and plays a critical role in immune development (Arrieta et al. 2014; Gensollen et al. 2016).  
53 Many external factors influence the airway microbiome, including mode of delivery at birth  
54 (Dominguez-Bello et al. 2010), breastfeeding (Biesbroek et al. 2014), antibiotic use (Noverr et  
55 al. 2004; Suárez-Arrabal et al. 2015), and exposure to tobacco smoke (Morris et al. 2013) and

56 pathogens (Bosch et al. 2013). While the influences of environmental exposures on microbiome  
57 composition are well known, the degree to which host genetics plays a role in structuring  
58 microbial communities is less well understood. In fact, recent data suggest that host genetics  
59 may play an important role in shaping microbiome composition. For example, the heritability of  
60 the gut microbiome was recently investigated in 1,126 twin pairs (Goodrich et al. 2016). Out of  
61 945 taxa examined, the RAs of 8.8% of taxa had non-zero heritability estimates suggesting that  
62 the abundances of those bacteria are influenced by host genetic variation. Moreover, more  
63 similar microbiome structures among related individuals compared to unrelated individuals  
64 (Yatsunenko et al. 2012; Tims et al. 2013) further supports a role for genetics influencing inter-  
65 individual variability in microbiome profiles. In fact, quantitative trait locus (QTL) approaches  
66 have successfully identified variation in candidate host genes that influence the RA of specific  
67 bacteria not only in *Drosophila* and mice but also in humans (Benson et al. 2010; McKnite et al.  
68 2012; Srinivas et al. 2013; Knights et al. 2014; Org et al. 2015; Blekhman et al. 2015; Davenport  
69 et al. 2015; Goodrich et al. 2016).

70         Studies of host genetic influences on the microbiome are particularly challenging due to  
71 the profound effects of environmental exposures on microbiome variability. It is not surprising,  
72 therefore, that two studies were unable to show host genotype effects on the human gut  
73 microbiome (Turnbaugh et al. 2009; Yatsunenko et al. 2012). Studies of related individuals and  
74 even twin pairs are confounded to a large extent by the more similar environments among close  
75 relatives, making it impossible to completely disentangle the relative roles of genes and  
76 environment. To address these challenges, we focused our studies on the Hutterites, a founder  
77 population that practices a communal, farming lifestyle that minimizes environmental variation  
78 between individuals (Ober et al. 2001), and should increase power to identify genetic influences  
79 on complex traits, including the airway microbiome composition. For example, Hutterites  
80 prepare and eat all meals in communal kitchens, smoking is prohibited and rare, and individual

81 family homes are nearly identical within each colony (communal farm) and very similar across  
82 colonies. Furthermore, the Hutterites in our studies are related to each other in a 13-generation  
83 pedigree and are descendants of only 64 founders. Finally, nearly all genetic variation in these  
84 individuals has been revealed through whole genome sequencing studies in 98 Hutterite  
85 individuals (Livne et al. 2015).

86 We previously reported studies of the gut microbiome in the Hutterites (Davenport et al.  
87 2014; 2015). Here we interrogated the interaction between host genetic variation and  
88 microbiome composition in two accessible sites in the upper airways, the nasal vestibule and  
89 the nasopharynx, which have important physiologic functions and relevance to airway diseases.  
90 While the nasal vestibule is located in the anterior nares and in direct contact with the  
91 environment, the nasopharynx is in the posterior nasal passage and continuous with the lower  
92 airway. Overall, our findings demonstrate that the airway microbiome is influenced by host  
93 genotype at many loci, and suggest that host expression of innate and mucosal immune  
94 pathway genes plays a significant role in structuring the airway microbiome.

95

## 96 **RESULTS**

### 97 *Nasal microbiome composition*

98 To characterize the variation of the microbiome from the nasal vestibule and the nasopharynx,  
99 we first analyzed 16S rRNA V4 gene sequences from 322 samples collected from 144 Hutterite  
100 adults in summer and/or in winter months (Table 1). After applying quality control filters and  
101 subsampling to 250,000 reads per sample, 83 million reads were assigned to 563 operational  
102 taxonomic units (OTUs) with 97% sequence identity. We identified sequences from eleven phyla,  
103 with three accounting for 98.94% of the sequences – Firmicutes (52.28%), Actinobacteria  
104 (29.81%) and Proteobacteria (16.85%). We then classified OTUs into 166 genera; six dominant  
105 genera accounted for 83.30% of the sequences (Figure 1 and Supplemental Table S1).

106 **Table 1: Sample composition:** A total of 332 samples were collected from 144 (58 male, 86  
 107 female) Hutterite adults (age 16 to 78 years).

| Nasal site  | Summer | Winter | Both seasons | Unique subjects |
|-------------|--------|--------|--------------|-----------------|
| Vestibule   | 87     | 80     | 34           | 133             |
| Nasopharynx | 88     | 77     | 40           | 125             |
| Both sites  | 72     | 60     | 23           | 144             |

108  
 109 **Figure 1: Taxonomic composition of bacterial communities in the nasal vestibule and the**  
 110 **nasopharynx, sampled in summer and in winter.** Genus level mean RA is shown for the 20  
 111 most abundant genera identified in the samples. The remaining 146 genera are grouped as  
 112 “other”. \*Genus unclassified, family level presented. \*\*Genus and family unclassified, order  
 113 level presented.

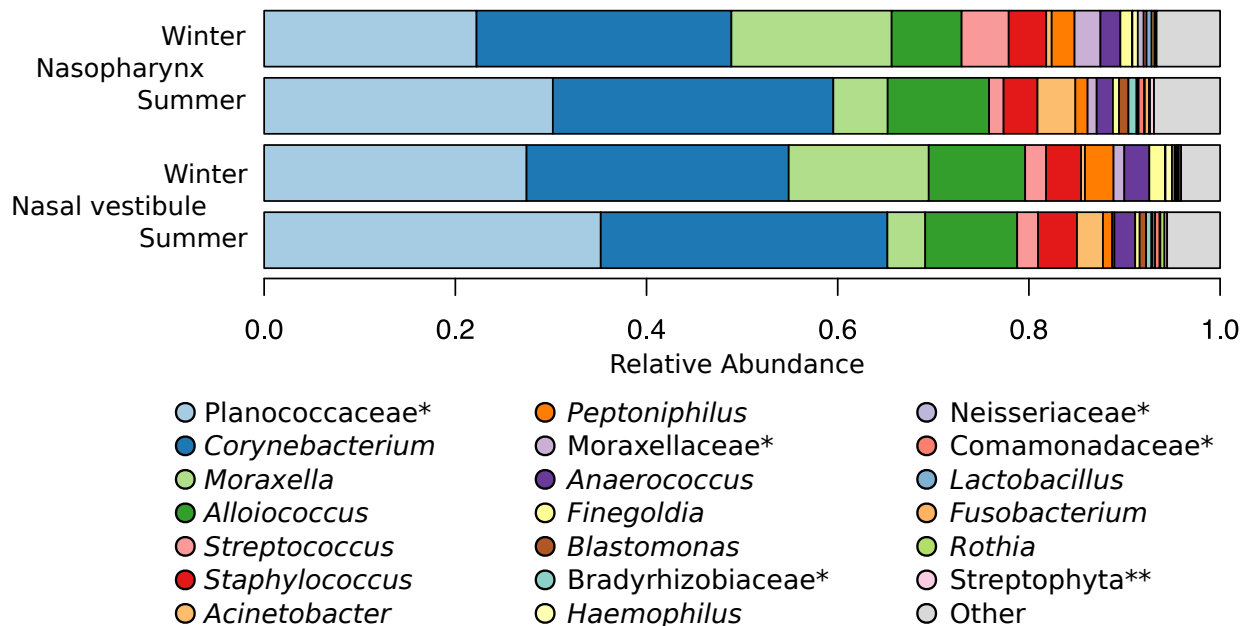

115 In a prior study in a largely overlapping sample of adult Hutterites, we identified large  
 116 seasonal variation in the gut (fecal) microbiome (Davenport et al. 2014). To see if similar  
 117 patterns were present in the nasal microbiome, we examined the genus level RAs for individuals  
 118 studied in both seasons (n=34 for the nasal vestibule and 40 for the nasopharynx). The RA of

119 12 genera in the nasal vestibule and 15 in the nasopharynx differed by season after applying a  
120 Bonferroni correction (paired Wilcoxon rank sum test,  $p < 0.0003$ ), nine of which were different  
121 between seasons at both nasal sites (Supplemental Table S2). Similarly, we looked for genus  
122 level RAs that differed between the nasal sites within each of the two seasons ( $n=72$  for the  
123 summer and 60 for the winter) but did not identify statistically significant differences.

124

### 125 *Nasal microbiome diversity*

126 We used three diversity metrics to assess within sample (alpha) diversity for each of the four  
127 seasonal nasal site groups – the number of species (richness), Shannon index, and evenness.  
128 Overall, the highest alpha diversity was observed in the nasopharynx in the summer (Figure 2  
129 and Supplemental Figure S1A), where the number of observed species and the Shannon index  
130 reflected higher diversity compared to the nasopharynx in the winter (paired Wilcoxon signed-  
131 rank test;  $p = 0.002$  and  $0.048$ , respectively). Additionally, there was higher diversity in the  
132 nasopharynx in the summer compared to the nasal vestibule in the summer (paired Wilcoxon  
133 signed-rank test; richness  $p = 4.6 \times 10^{-7}$ , Shannon index  $p = 0.009$  and evenness  $p = 0.031$ ,  
134 respectively). Although higher diversity trends were observed in the nasopharynx in the summer  
135 compared to the winter, these associations were largely due to decreased alpha diversity  
136 among women compared to men in the winter (Wilcoxon signed-rank test; richness  $p = 0.03$ ,  
137 Shannon index  $p = 0.002$  and evenness  $p = 0.001$ , respectively; Supplemental Figure S1B).  
138 Lastly, Shannon index and evenness decreased with increasing age only in the nasopharynx in  
139 the summer ( $p = 0.019$ ; Supplemental Figure S2).

140

141 **Figure 2: Within sample alpha diversity:** Alpha diversity measurements for microbial  
142 communities from the nasal vestibule and the nasopharynx by season. The nasopharynx in the  
143 summer (light green) shows the overall largest alpha diversity. \*Paired Wilcoxon-rank sum test  $p <$   
144  $0.5$ ; \*\*  $p < 0.01$ ; \*\*\* $p < 0.001$ .

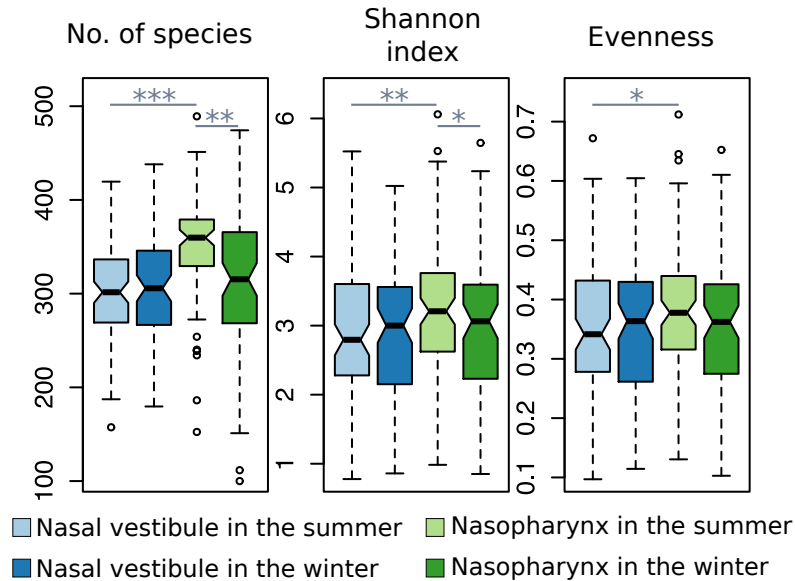

145

146

147

148

149

150

151

152

153

154

155

156

157

158

159

160

161

We next analyzed community composition and structure between samples (beta diversity) by calculating Euclidean distances between all pairs of individuals. In the seasonal analyses, the summer samples for both the nasal vestibule and the nasopharynx had lower Euclidean distances compared to their respective winter samples (Wilcoxon signed-rank test, nasal vestibule  $p < 2.2 \times 10^{-16}$  and nasopharynx  $p < 2.2 \times 10^{-16}$ ), reflecting more similar microbiome diversity between pairs of individuals in the summer than in the winter. Moreover, Euclidean distances for the same individual paired with him/herself between seasons (separately within the nasal vestibule and nasopharynx samples) and between nasal sites (separately within the summer and the winter samples) were lower than the respective distances calculated between each individual with all other individuals (Wilcoxon signed-rank test nasal vestibule between seasons  $p = 9.25 \times 10^{-8}$ ; nasopharynx between seasons  $p = 3.97 \times 10^{-12}$ ; summer between nasal sites  $p < 2.2 \times 10^{-16}$ , winter between nasal sites  $p < 2.2 \times 10^{-16}$ ; Supplemental Figure S3). These results reflect stability in microbiome structure between seasons and nasal sites within individuals, potentially reflecting a genetic component to microbiome composition and diversity.



162 *Correlation between host genetic similarity and microbiome structure*

163 To evaluate the relationship between genetic similarity (or relatedness) among pairs of  
164 individuals and the similarity of their nasal microbiomes, we compared genetic distance,  
165 measured by the kinship coefficient and beta diversity between all pairs of individuals in the  
166 sample combined across seasons (see methods). We reasoned that if there was a genetic  
167 influence on bacterial composition and diversity, more related individuals should have lower  
168 measures of beta diversity, reflecting more similar microbiomes. To assess significance we  
169 performed 10,000 permutations for each of the two nasal sites. This analysis revealed a  
170 significant negative Spearman correlation between kinship and beta diversity (Figure 3).

171

172 **Figure 3: Heat scatterplots of Euclidean distance (beta diversity) by kinship coefficient.**

173 Individuals with larger kinship coefficients (more related) have more similar beta diversities  
174 (lower Euclidean distances). Red dashed represents the trend line from a linear model. Nasal  
175 vestibule  $p < 1 \times 10^{-4}$ ; nasopharynx  $p = 4.0 \times 10^{-4}$ .

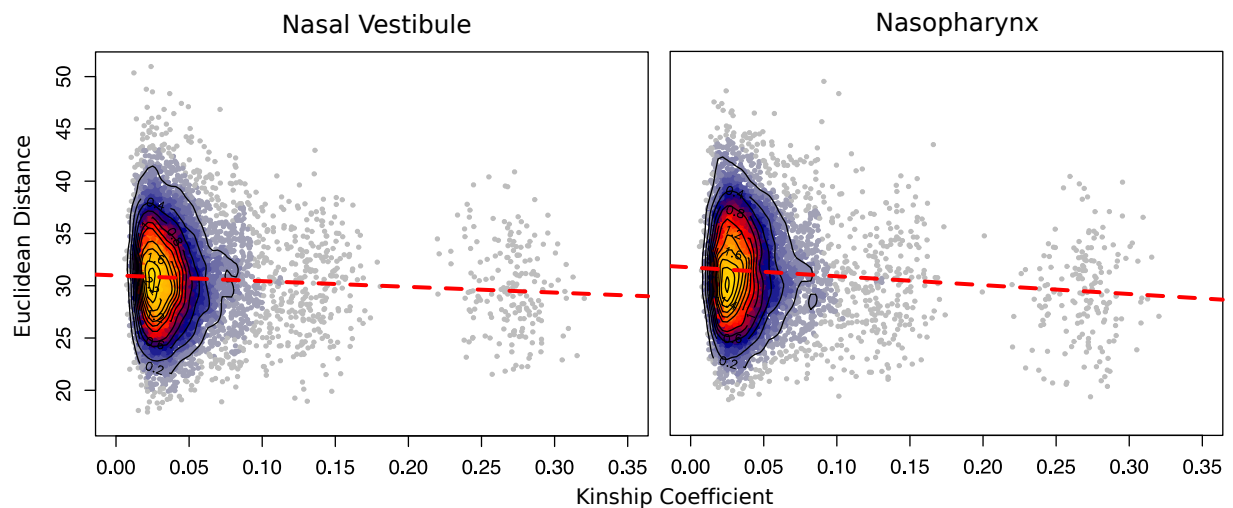

176

177 Although an individual's microbiome composition is highly sensitive to the household  
178 environment (Lax et al. 2014), sharing of households by first degree relatives did not  
179 significantly affect the correlation between beta diversity and kinship in our sample. To examine

180 this directly, we removed all first degree relatives who lived in the same household (three sibling  
181 pairs and their parents; 15 out of 175 first-degree relative pairs in the sample) and repeated the  
182 analysis. The correlation between kinship and Euclidean distance remained significant (nasal  
183 vestibule  $p < 1 \times 10^{-4}$  and nasopharynx  $p = 5.0 \times 10^{-4}$ ), indicating that the significant effect of  
184 kinship on microbiome similarities between Hutterite adults is not likely due to shared  
185 environments. Instead, we attribute these correlations largely to shared genetic variation.

186

### 187 *Genome-wide association studies of relative abundance*

188 To directly test for host genetic effects on genus level bacteria in the nasal vestibule and in the  
189 nasopharynx, we performed microbiome quantitative trait locus (mbQTL) mapping on the  
190 bacterial RAs for each nasal site in the summer sample and winter samples separately, and in a  
191 larger sample combining both seasons. We tested for associations between 52 and 90 genera  
192 with 148,653 SNPs ( $LD\ r^2 < 0.5$ ) using a linear mixed model as implemented in GEMMA (Zhou  
193 and Stephens 2012), and included sex and age as fixed effects and kinship as a random effect  
194 to adjust for the relatedness between all pairs of individuals in our study. Our analyses revealed  
195 37 mbQTLs at  $q < 0.05$ , three of which were associated with multiple bacteria (overall 37  
196 variants associated with 22 genus level bacteria). Of the 37 mbQTLs, 14 were associated with  
197 10 genera in the nasal vestibule and 23 were associated with 14 genera in the nasopharynx.  
198 The results for mbQTLs with  $q < 0.05$  are shown in Table 2 and results for 108 mbQTLs with  $q <$   
199  $0.10$  are shown in Supplemental Table S2.

200 The most significant association was with an intergenic SNP 8kb upstream of the *TINCR*  
201 gene on chromosome 19 and the abundance of *Dermacoccus* (phylum Actinobacteria) in the  
202 nasal vestibule in the summer (rs117042385;  $p = 1.61 \times 10^{-8}$ ;  $q = 0.002$ , Figure 4). *TINCR* is a  
203 long non-coding RNA gene that controls human epidermal differentiation and directly binds to  
204 the peptidoglycan recognition protein 3 (*PGLYRP3*) transcript (Kretz et al. 2013). A second  
205 mbQTL (rs28362459), located 314 kb downstream from the *TINCR* mbQTL ( $r^2 = 0.26$ ;  $D' = 0.76$ ),

206 was also associated with the RA of *Demacoccus* in the same site and season as *TINCR* ( $p =$   
207  $9.47 \times 10^{-7}$ ,  $q = 0.047$ , Figure 4). rs28362459 is a missense variant in fucosyltransferase 3  
208 (*FUT3*), a gene essential for the synthesis of Lewis blood groups (Taylor-Cousar et al. 2009;  
209 Yamamoto et al. 2014).

210 To determine if the association of increased *Demacoccus* RA with the rs28362459-C  
211 allele in *FUT3* is independent of the association with the rs117042385-C allele upstream of  
212 *TINCR*, we phased the two variants and examined the four haplotypes (seven diplotypes)  
213 present in our sample. This revealed independent effects of genotypes at both SNPs  
214 contributing to the RA of *Demacoccus* ( $p = 4.65 \times 10^{-9}$ ; Figure 4C). In particular, individuals who  
215 were homozygous for both alleles (rs117042385-CC/rs28362459-CC) had the highest RA of  
216 *Demacoccus*, while one or two copies of the *FUT3* rs28362459-A allele on a homozygous  
217 *TINCR* rs117042385-CC background was associated with decreased RA. Overall, the presence  
218 of a *FUT3* rs28362459-A allele was associated with lower RA regardless of genotype at *TINCR*  
219 rs117042385. The two individuals who were homozygous for both the *TINCR* rs117042385-T  
220 and *FUT3* rs28362459-A alleles did not have any *Demacoccus* sequences detected. Overall,  
221 these results suggest that the *FUT3* rs28362459 and *TINCR* rs117042385 variants (or variants  
222 in strong LD with them) are exerting independent effects on the RA of *Demacoccus*.

223

224 **Figure 4: Associations with the RA of *Demacoccus* in the nasal vestibule in the summer.**

225 **A. Manhattan plot.** Association results are presented for variants pruned for LD ( $r^2 < 0.5$ ). Four  
226 variants on chromosomes 5 and 19 are associated with the RA of *Demacoccus* at a  $q < 0.05$   
227 significance threshold (red line). **B. Locus and genotype plots for the 2 mbQTLs on**  
228 **chromosome 19.** Variants included in the locus plot are those with MAF  $> 10\%$  in the Hutterites,  
229 prior to LD pruning. Genotype plots show both minor alleles (T at rs117042385 and A at  
230 rs28362459) are associated with lower *Demacoccus* RA. **C. Boxplots of *Demacoccus***

231 **residuals for rs117042385 and rs28362459 phased haplotypes.** Numbers underneath each  
 232 boxplot represent the number of individuals in each genotype or haplotype class.

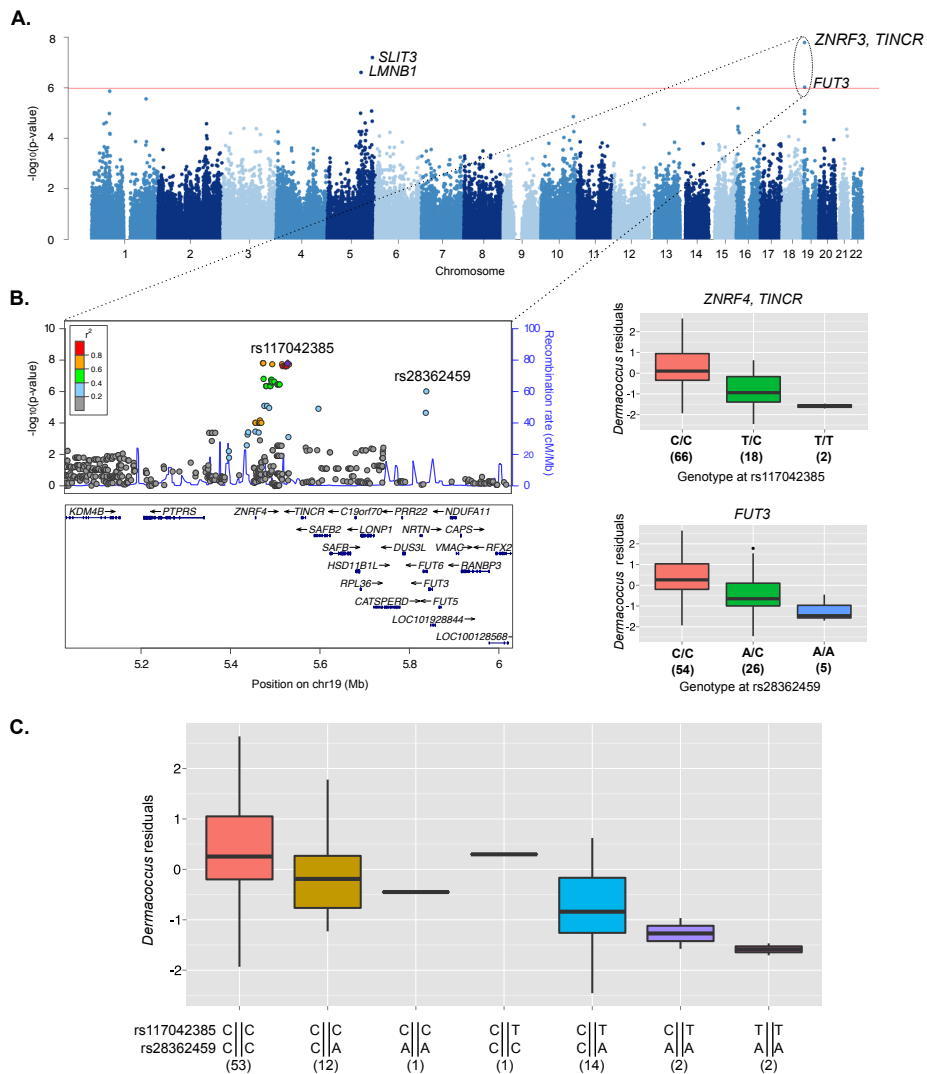

233  
 234 Another mbQTL that linked *PGLYRP* genes more directly to host regulation of the  
 235 microbiome is an association between a missense variant in *PGLYRP4* (rs3006458) on  
 236 chromosome 1 and the RA of an unclassified genus of family Micrococcaceae (phylum  
 237 Actinobacteria) in the combined season nasopharynx sample ( $p = 5.10 \times 10^{-7}$ ;  $q = 0.032$ ,  
 238 Supplemental Figure S4A). This same SNP was also associated with genus *Aerococcus* in the  
 239 nasopharynx in the winter at a less stringent  $q$  value cutoff (phylum Firmicutes;  $p = 1.28 \times 10^{-6}$ ;  $q$   
 240 = 0.06). Peptidoglycan recognition proteins (PGRPs) are a conserved family of antibacterial

241 pattern recognition molecules that directly bind peptidoglycan and other bacterial cell wall  
242 components, including lipopolysaccharide (LPS) (Kashyap et al. 2011).

243

244 *mbQTL associations with multiple bacteria*

245 Five mbQTLs ( $q < 0.05$ ), including the *PGLYRP4* mbQTL discussed above, had associations  
246 with multiple bacteria within the same nasal site at a relaxed significance threshold ( $q < 0.10$ ).

247 The largest number of associations identified with a single mbQTL was an intronic variant in the

248 Leucine Rich Repeat Containing 16A (*LRRC16A*; rs1543603) and the RAs of five

249 Proteobacteria in the nasopharynx in the summer (unclassified genus of family Caulobacteraceae,

250 unclassified genus of family Bradyrhizobiaceae, *Parvibaculum*, *Blastomonas* and *Rheinheimera*),

251 of which Caulobacteraceae was the most significant ( $p = 2.30 \times 10^{-8}$ ,  $q = 0.006$ ; Supplemental

252 Figure S4B). *LRRC16A* encodes CARMIL (capping protein, Arp2/3, and Myosin-I linker), a

253 protein that plays an important role in cell shape and motility (Yang et al. 2005).

254 The association between genotype at a single SNP, rs1543603, with the RAs of five

255 genus level bacteria suggested potential functional community level relationships between these

256 five Proteobacteria. Indeed, the RAs of all five Proteobacteria were correlated with each other

257 (correlation coefficients  $> 0.773$ ; median 0.924). A co-occurrence network (Friedman and Alm

258 2012) assigned all five bacteria to a single network that included 13 bacteria (12 Proteobacteria

259 and one Bacteroidetes) from among the 90 genera tested in the nasopharynx in the summer

260 (Figure 5). In this network, genera from families Bradyrhizobiaceae and Caulobacteraceae, two

261 of the five bacteria associated with rs1543603 ( $p = 3.25 \times 10^{-7}$  and  $2.30 \times 10^{-8}$ , respectively) are

262 the largest hubs with nine neighbors each. These findings suggest that host genetic effects can

263 act to modulate microbial community patterns, by directly affecting host-microbe interactions

264 with only one or a few main drivers of the community.

265

266 **Figure 5: Five genus-level bacteria associated with rs1543603 are hubs in a co-**  
267 **occurrence module of 12 Proteobacteria and one Bacteroidetes.** Co-occurrence networks  
268 built from correlation coefficients between all 90 genus level RAs determined in the  
269 nasopharynx summer sample. Nodes represent bacteria and are listed by number, colored by  
270 phylum and sized proportionally to the RA of each bacterium. Edges represent correlations  
271 greater than 0.75. Blue node borders represent the five bacteria associated with rs1543603, an  
272 intronic variant in *LRRC16A*.

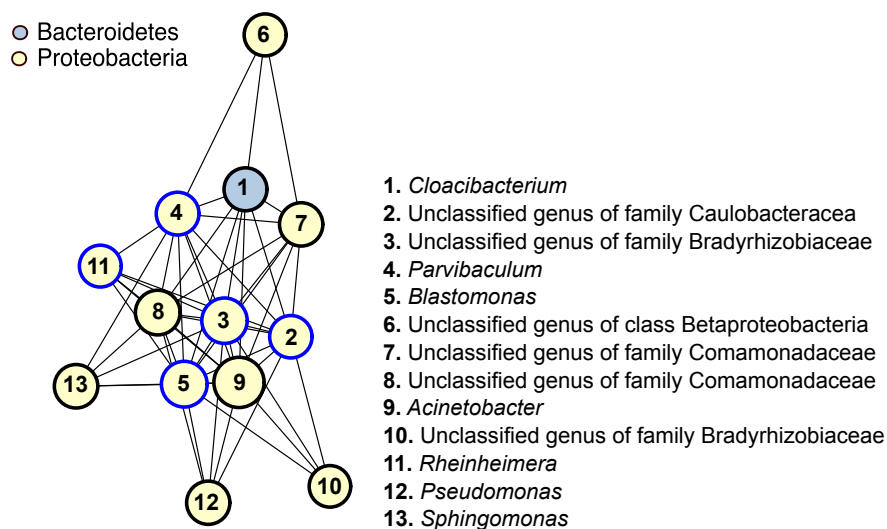

273

#### 274 *Pathway analyses of genes near mbQTLs*

275 To further understand how host genetic variation regulates nasal microbiome composition and  
276 to identify shared pathways among the mbQTLs identified in this study, we selected the closest  
277 gene to each mbQTL ( $q < 0.10$ ; 131 genes) and to all variants in LD ( $r^2 > 0.8$ ) with each mbQTL,  
278 using LD estimates in the Hutterites. We then generated protein-protein interaction networks  
279 among these genes, using Ingenuity Pathway Analysis Knowledge Base (IPA®, QIAGEN  
280 Redwood City, CA), a curated database of biological interactions and functional annotations.  
281 IPA identified two networks with Fisher exact  $p < 10^{-25}$  (Figure 6). The most significant network  
282 included 21 of the 131 genes, nine of which were near mbQTLs with  $q < 0.05$  (Fisher exact  $p =$   
283  $10^{-43}$ ; Figure 6A). This network contained many hubs including *SMAD2*, a gene that regulates

284 the production of immunoglobulin A (IgA) by LPS-activated B-cells and activates immune  
285 response at other mucosal surfaces upon stimulation by pathogenic microbes (Malhotra and  
286 Kang 2013). The second significant network (Fisher exact  $p = 10^{-29}$ ) contained 17 of the 131  
287 genes, also with nine genes near mbQTLs with  $q < 0.05$ . Many of the hubs in this network  
288 represent important modulators of mucosal immunity, including immunoglobulins A and G (IgG  
289 and IgG2a), IL12/IL12RA, TCR and STAT5A/B (Macpherson et al. 2008; Holt et al. 2008; Mantis  
290 and Forbes 2010).

291

292 **Figure 6: Ingenuity Pathway Analysis (IPA) interaction networks.** Networks show genes  
293 near nasal mbQTLs are enriched for mucosal immunity pathways. Two significant networks ( $p <$   
294  $10^{-25}$ ) are presented. **A.** Network one is centered on *SMAD2* and *ERK1/2* ( $p < 10^{-43}$ ; 21 genes).  
295 **B.** Network two is a highly connected network centered on *IL2RA*, *STAT5a/b* and *IL12*, among  
296 others. This network contains many of the key regulators of mucosal immunity ( $p < 10^{-29}$ ; 17  
297 genes). Node color represents genes near microbiome QTL associations in the nasal vestibule  
298 (blue) or in the nasopharynx (green); open symbols are genes added by IPA. Edges represent  
299 direct (solid) and indirect (dashed) interactions in the IPA Knowledge Base database. Node  
300 shapes correspond to functional classes of gene products: concentric circles for groups or  
301 complexes, diamonds for enzymes, rectangles for transcriptional regulators or modulators, ovals  
302 for trans-membrane receptors and circles for other.



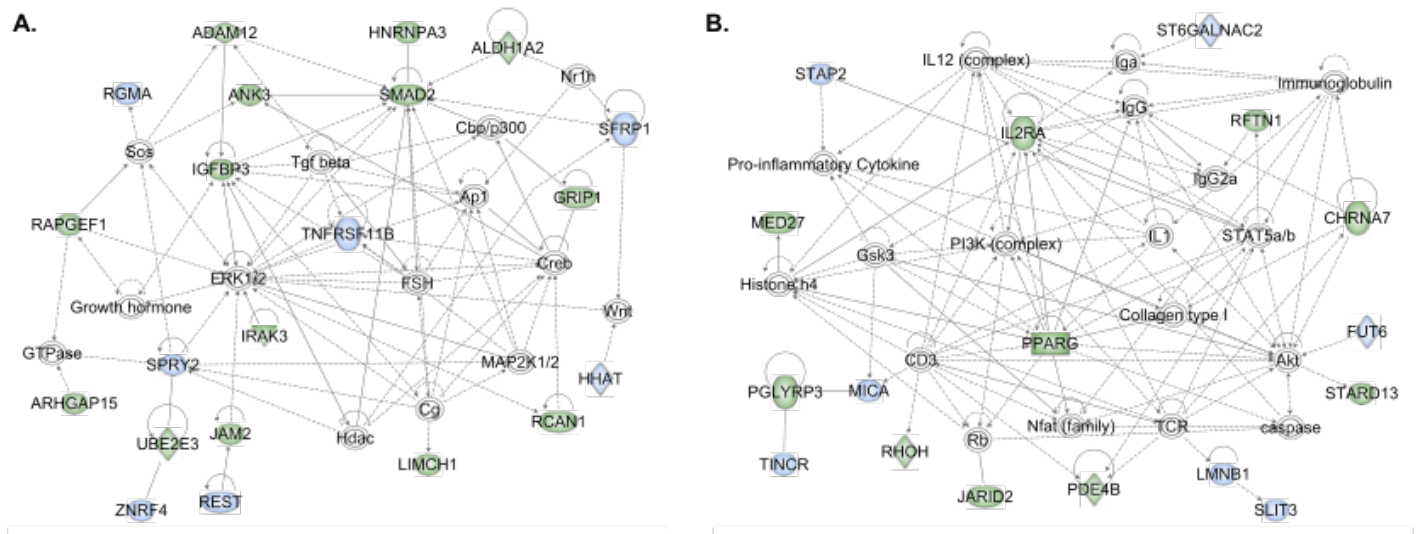

303

304 *Comparison of genes near mbQTLs in the Hutterites to the TwinsUK study*

305 The TwinsUK study, the largest human gut microbiome QTL study to date, recently reported a  
 306 candidate gene study (Goodrich et al. 2016) in which 17 genes within 10 kb of 15 mbQTLs were  
 307 associated with 15 different taxa (false discovery rate (FDR) less than 5%). To determine if  
 308 genes associated with the RA of bacteria in the upper airway also influence the RA of bacteria  
 309 in the gut, we compared 53 genes near the 37 mbQTLs discovered in our study ( $q < 0.05$ ) to the  
 310 17 genes reported in the TwinsUK Study. Two different intronic variants in the slit guidance  
 311 ligand 3 (*SLIT3*) gene on chromosome 5 were associated with the RA of an unclassified genus  
 312 of family *Clostridiaceae* in TwinsUK (rs10055309) and with the RA genus *Dermacoccus* in the  
 313 nasal vestibule in the summer in our study (rs77536542;  $p = 6.35 \times 10^{-8}$ ; Figure 4A). SNP  
 314 rs10055309 was the most significant QTL reported the TwinsUK study. *SLIT3* is a secreted  
 315 protein that is widely expressed across many tissues with highest expression in skin, brain  
 316 cerebellum and lung (Dickinson et al. 2004). *SLIT3* hypermethylation has been reported in a  
 317 number of human cancers (Dickinson et al. 2004) and *SLIT3* expression is increased in LPS  
 318 stimulated macrophages in mice (Tanno et al. 2007). The combined data from the TwinsUK



319 Study and our study suggests that this gene may play a role in the modulating bacterial  
320 abundances across diverse body sites in humans.

321

## 322 **DISCUSSION**

323 Our study is the first to assess the role of genome-wide host genetic variation in shaping the  
324 human microbiome at two upper airway sites. We first demonstrated reduced bacterial beta  
325 diversity between more closely related pairs of individuals, and then discovered associated  
326 genetic variants at functionally related genes. These combined results indicate a significant role  
327 for host genotype in patterning microbial diversity in the nose.

328 Our results further suggest that the upper airway may be the site of important gene-  
329 environment interactions. In this context, host genotype at many loci may ultimately impact  
330 health and disease by modulating particular members of the microbial community. For example,  
331 a missense variant in fucosyltransferase 3 (*FUT3*; rs28362459) was strongly associated with  
332 decreased abundance of *Demacoccus* in the nasal vestibule in the summer. This SNP is  
333 predicted to be deleterious by both Polymorphism Phenotyping (PolyPhen) v2 (Adzhubei et al.  
334 2010) and Combined Annotation Dependent Depletion (CADD) (Kircher et al. 2014) scores  
335 (0.997 and 15.12, respectively). Interestingly, the non-secretor phenotype, characterized by a  
336 null variant in another FUT gene, *FUT2*, and the resulting absence of ABH antigens in the  
337 mucosa in homozygotes for the null allele, influences the composition and diversity of the  
338 microbiome in the human intestinal tract (Wacklin et al. 2011; Rausch et al. 2011). Moreover,  
339 variants in both *FUT2* and *FUT3* have been shown in GWAS to increase susceptibility to  
340 diseases associated with both mucosal surface pathobiology and microbiome composition, such  
341 as cystic fibrosis (Taylor-Cousar et al. 2009), Crohn's disease (Hu et al. 2014) and ulcerative  
342 colitis (Hu et al. 2016). Our study extends a role for fucosyltransferases to the nasal mucosal  
343 surface, and further implicates host genetic influences on bacterial diversity at this site.

344 Four mbQTLs show effects on phylogenetically diverse phyla and two were identified in  
345 different seasons and nasal sites. In particular, a missense variant in *PGLYRP4* (rs3006458)  
346 was associated with the abundance of genus *Aerococcus* (Firmicutes) in the nasopharynx in the  
347 summer and with family Micrococcaceae (Actinobacteria) in the nasopharynx in the combined  
348 sample. The RAs of *Aerococcus* and Micrococcaceae are only weakly correlated with each other  
349 indicating that these are likely independent associations. Moreover, the associations with  
350 phylogenetically distant bacteria and in different subsamples (summer vs. combined) suggest  
351 that *PGLYRP4* has pleiotropic effects over several organisms. Alternatively, the SNP identified  
352 in our study (rs3006458) could be tagging a haplotype with multiple variants that have  
353 independent effects on different bacterial abundances. The genomic region that includes the  
354 PGLYP genes includes a cluster of genes implicated in epidermal barrier function (Toulza et al.  
355 2007) and SNPs in this region show extensive LD. However, independent evidence suggests  
356 that *PGLYRP4* may be the target gene of this association. The rs3006458-T allele, which is  
357 associated with lower RA of *Aerococcus* and Micrococcaceae in our study, was associated with  
358 increased gene expression of the *PGLYRP4* gene in epithelial and mucosal tissues (skin, small  
359 intestine and esophageal mucosa) in the Genotype-Tissue Expression (GTEx Consortium 2015),  
360 and in lung tissue in a separate eQTL study (Hao et al. 2012). These tissues serve as physical  
361 barriers and provide innate immune functions essential for antimicrobial defense (Gallo and  
362 Hooper 2012). Collectively, these data suggest that host genotype at rs3006458 (or a variant in  
363 LD with rs3006458) regulates the expression in *PGLYRP4* in the skin, lung and airway mucosa  
364 and functions to modulate bacterial abundance, possibly beyond the two genera identified in this  
365 study. The link between genetic variation in host PGRPs and microbiome abundance revealed  
366 in this study indicates that at least some of the important role these proteins play in modulating  
367 communities of symbiotic organisms (Royet et al. 2011) is attributable to host genetic variation.

368 Eight of the mbQTLs identified in our study at a relaxed  $q < 0.10$  influenced the  
369 abundance of more than one organism. Most were identified within the same season and nasal

370 site and four influenced the abundance of multiple closely related bacteria. For example, an  
371 intronic variant in *LRRC16A* (rs1543603) was associated with the abundance of five highly  
372 correlated genera of phylum Proteobacteria in the nasopharynx in the summer. These five  
373 bacteria co-occur in a larger network of 12 Proteobacteria and one Bacteroidetes, suggesting  
374 that they may be physically interacting and that their overall community structure is influenced  
375 by host genotype. Although not much is known about *LRRC16A*, other proteins with leucine-rich  
376 repeat (LRR) domains, such as nucleotide-binding oligomerization domain receptors (NODs)  
377 and toll-like receptors (TLRs) (Ng et al. 2011), function as recognition receptors in innate  
378 immunity.

379         Although our study provides novel insights into host genetic influences on the nasal  
380 microbiome, there are some limitations. In particular, the size of our sample is relatively small  
381 for genetic mapping (77-88 individuals in seasonal analyses; 125 and 133 individuals in the  
382 combined). We reasoned that the reduced environmental heterogeneity among Hutterite  
383 individuals would enhance the effects of genetic variation and facilitate the detection of  
384 associated variants. While we were successful in identifying mbQTLs, we acknowledge that  
385 there are likely many more associations to be found in larger samples. A second limitation is the  
386 multiple testing burden that results from the high dimensionality of the microbiome. While we  
387 reduced the number of tests performed by mapping only genus level bacteria present in the  
388 majority of individuals, we only corrected for multiple testing within each study and did not  
389 correct for the 90 bacteria for which we performed mbQTL mapping. Although we used a fairly  
390 stringent threshold of genome-wide significance ( $q < 0.05$ ), we acknowledge that some of our  
391 findings may be false positives. Lastly, the genetic effects revealed by our study are context  
392 specific due to the many environmental and stochastic factors that affect microbiome  
393 composition and, therefore, challenging to replicate. For example, even within our study of a  
394 relatively homogenous population, we detected significant effects of season, age, and gender.  
395 In fact, most of the mbQTLs that we identified were specific to one season and demonstrate that

396 even small temporal changes (~6 months) in the RAs of bacteria within the same individuals  
397 can mask or enhance genetic effects. Although we did not formally replicate the results in  
398 independent populations, the identification of intronic variants within the gene *SLIT3* in our study  
399 and in the TwinsUK study (Goodrich et al. 2016) bolsters confidence in the involvement of this  
400 gene in regulating microbial structure across multiple mucosal sites.

401       These limitations aside, our study provides evidence for genetic contributions to  
402 modulating variability of the nasal microbiome, a trait that has been linked to a number of airway  
403 diseases (Dickson et al. 2014). Importantly, our findings support the concept that host genetic  
404 variation directly influences the expression or function of genes that are specifically involved in  
405 innate mucosal immunity pathways. Such a framework is consistent with previous reports  
406 showing that antimicrobial peptides (Salzman et al. 2010; Royet et al. 2011) and host immunity  
407 (Hooper and Macpherson 2010) are key modulators of microbial defense in the mucosa. Our  
408 data further suggest that host genetic effects on immune genes modulate particular bacteria or  
409 the structure of whole microbial communities in the upper airways. We speculate that  
410 interactions between host genetics and microbiome structure or composition in the upper airway  
411 can influence dysbiotic tendencies that may predispose to respiratory disease and could be  
412 subject to intervention. Indeed, moving forward, more detailed analyses of the complex  
413 relationship between genetic variation in host mucosal immunity and the microbiome —  
414 captured here in a snapshot in the upper airway — are required to fully characterize  
415 determinants of an inherently dynamic microbial ecosystem. Such work could potentially identify  
416 targets for novel therapeutic strategies useful across a wide range of respiratory diseases.

417

## 418 **METHODS**

### 419 *Sample collection*

420       Nasal brushings from Hutterites ages 16 to 78 from five colonies located in South  
421 Dakota, all within 14 miles of each other, were collected at two time points, winter

422 (January/February 2011) and summer (July 2011), and from two nasal sites, the nasal vestibule  
423 and the nasopharynx. Samples from each of the two nasal sites were collected from opposite  
424 nares using sterile flock collection swabs (Puritan© 25-3316). The Human Microbiome Project  
425 anterior nare collection protocol (Aagaard et al. 2013) was used for the nasal vestibule and an  
426 adaptation of the Pasculle et al. protocol (Pasculle et al. 2008) was implemented for the  
427 nasopharynx. After excluding samples with low DNA yield, low sequencing read depth, antibiotic  
428 history within the prior 3 months, or missing genotypes, our final data consists of 133 individuals  
429 with nasal vestibule samples (87 summer and 80 winter) and 125 individuals with the  
430 nasopharynx samples (88 summer and 77 winter; Table 1).

431

#### 432 *Sample DNA extraction library preparation and sequencing*

433 Nasal brushes were immediately frozen at  $-20^{\circ}\text{C}$  following collection, shipped on dry ice, and  
434 stored at  $-80^{\circ}\text{C}$ . DNA extraction was carried out using the BiOstic® Bacteremia DNA Isolation  
435 Kit (12240-50). DNA concentration and purity were assessed using the Nanodrop 1000  
436 spectrophotometer (Thermo Scientific, IL, USA). The 16S rRNA gene V4 region was amplified  
437 following conditions in Caporaso et al. protocol (Caporaso et al. 2012) using 62 different region-  
438 specific primers labeled with a unique 12-base Golay barcode sequence in the reverse primer.  
439 Final libraries were quality controlled prior to pooling with the Agilent Bioanalyzer DNA 1000  
440 (Agilent Technologies, CA, USA). Libraries were pooled into 8 pools of 62 samples and  
441 sequenced on the HiSeq2000 platform (Illumina Inc, CA, USA) under a single end 102 base pair  
442 protocol.

443

#### 444 *Sequencing and taxonomic classification*

445 Data was pre-processed using CASAVA 1.8.1. Following sample de-multiplexing, 617,909,462  
446 sequence reads were processed using the Quantitative Insights into Microbial Ecology (QIIME)

447 1.8.0 toolkit (Caporaso et al. 2010b). Quality controlled reads were required to have an exact  
448 match to an expected barcode, zero ambiguous base calls, less than three consecutive low  
449 quality base calls, and a minimum Phred quality score of 20 along the entire read. We used an  
450 open-reference OTU workflow where sequences were first clustered against the Greengenes  
451 May 2013 reference (Caporaso et al. 2010b; DeSantis et al. 2006) and reads that did not cluster  
452 with known taxa (97% identity) were subjected to *de novo* clustering. Representative sequences  
453 were aligned using PyNAST version 1.2.2 (Caporaso et al. 2010a) and the taxonomy of each  
454 OTU cluster was assigned with the *uclust* classifier version 1.2.22q (Edgar 2010). We applied  
455 an OTU abundance filter of 0.005% (Bokulich et al. 2013) to reduce spurious OTUs and  
456 obtained a final dataset of 563 OTUs.

457

#### 458 *Data processing*

##### 459 Seasonal

460 For each of the four seasonal groups (nasal vestibule in the summer and in the winter, and  
461 nasopharynx in the summer and winter), a genus level RA table was calculated after  
462 subsampling reads to 250,000 per sample. Each bacteria's RA was then quantile normalized  
463 using the *qqnorm* function in R. Next, PCA was performed using the *prcomp* function in R and  
464 each of the top 10 principal components (PCs, explaining ~76%-78% of the variance) were  
465 tested in a linear model against technical covariates. In at least one of the seasonal groups, we  
466 identified correlations between one of the PCs with DNA concentration prior to PCR, final base  
467 pair fragment size and date of sampling ( $p < 0.001$ ). PCR adapter barcode, library batch, order  
468 within library batch, and final library concentration were not significant. After regressing out the  
469 identified technical covariates from the normalized RAs, we performed PCA on the residuals  
470 and tested for associations between the top 10 PCs and biological covariates. Age and sex  
471 were significant and were therefore adjusted for in all subsequent analyses. Next, to reduce the  
472 burden of multiple testing in the seasonal mapping studies, we removed genera that were

473 detected in fewer than 75% of individuals. This resulted in 78 genus level RAs in the nasal  
474 vestibule in the summer, 52 in the nasal vestibule in the winter, 90 in the nasopharynx in the  
475 summer and 59 in the nasopharynx in the winter.

#### 476 Combined seasons

477 Although combining samples across seasons could introduce noise, it provides the largest  
478 possible sample size and consequently greatest power for genetic associations with bacteria  
479 that do not vary in abundance across seasons. Therefore, for each nasal site, we averaged the  
480 summer and winter genus level RA residuals obtained after quantile normalization and the  
481 regression of identified technical covariates for individuals with measurements during both  
482 seasons, or included the one season result for those with only one measurement (referred to as  
483 the combined sample). We selected all genus level bacteria present in at least 75% of  
484 individuals in either season, which resulted in 76 genus level RAs in the nasal vestibule and 90  
485 in the nasopharynx. We performed PCA on the combined seasons matrix to verify variation  
486 among samples did not separate the combined samples from the samples with one seasonal  
487 measurement. Season of origin (summer, winter or averaged) was not correlated with any of the  
488 top 10 principle components in either nasal site (Supplemental Figure S5).

489

#### 490 *Genotype data*

491 The Hutterite individuals in our study are related to each other in a 13-generation pedigree that  
492 includes 3,671 individuals, all of whom originate from 64 founders. Using PRIMAL (Livne et al.  
493 2015), an in-house pedigree-based imputation algorithm, whole genome sequences from 98  
494 Hutterite individuals were phased and imputed to 1,317 Hutterites who were previously  
495 genotyped on Affymetrix arrays (Ober et al. 2008; Yao et al. 2014; Cusanovich et al. 2012). For  
496 mapping studies, we first selected 3,161,460 variants with genotype call rates greater than 95%  
497 in our sample and minor allele frequencies (MAF) > 0.10 in any of the 4 season/site subsamples.  
498 Next, we estimated LD in the Hutterite data using PLINK (Purcell et al. 2007), and pruned

499 variants for LD using an  $r^2$  threshold of 0.5, to yield a final set of 148,653 variants for mapping  
500 studies.

501

#### 502 *Diversity metrics*

503 Alpha diversity metrics at the species level (observed species, Shannon index and evenness)  
504 were calculated in QIIME (Caporaso et al. 2010b) using the `alpha_diversity.py` script after  
505 subsampling reads from 1,000 to 10,000 every 1,000 reads, from 10,000 to 100,000 every  
506 10,000 reads and from 150,000 to 250,000 every 50,000 reads. Each subsampling series was  
507 completed 10 times and rarefaction curves were plotted. Diversity metrics were averaged from  
508 the 250,000 read subsamples using the `collate_alpha.py` script and this metric was compared  
509 across seasons and nasal sites.

510 To calculate beta diversity, we first obtained the OTU table using *phyloseq* (McMurdie  
511 and Holmes 2013), quantile normalized OTU abundances using *qnorm* in R and regressed out  
512 technical covariates (DNA concentration prior to PCR, final base pair fragment size and date of  
513 sampling). Next, we calculated pairwise Euclidean distance using the *vegdist* function in the  
514 *vegan* R package.

515

#### 516 *Kinship associations to beta diversity*

517 Pair-wise kinship coefficients were previously calculated by PRIMAL (Livne et al. 2015) using  
518 271,486 variants genotyped on Affymetrix platforms. The average kinship coefficient between all  
519 pairs of individuals ( $n = 144$ ) in our study was 4.51% (range 0.60%-32.03%). We performed  
520 10,000 permutations to assess the association between pairwise Euclidean distances and kinship  
521 coefficients in the combined seasons samples (nasal vestibule 8,778 pairs, nasopharynx 7,750).  
522 The p-value is the number of times out of 10,000 permutations that the Spearman correlation of  
523 the permuted sequence pair was more extreme than the observed pair.

524



525 *Co-occurrence network analyses*

526 We used SparCC (Friedman and Alm 2012) to calculate nasopharynx in the summer correlation  
527 coefficients between all 90 genera tested in our mapping studies. We applied default settings  
528 and assigned p-values calculated from 100 bootstraps. Co-occurrence networks were  
529 generated from the SparCC correlation matrix for genera with correlation  $r^2 > 0.75$  and  $p < 0.01$   
530 (1/100 bootstraps). The network was generated using *igraph* R package, where nodes  
531 represent each genera and edges represent correlations between the genera above the applied  
532 threshold.

533

534 *Ingenuity Pathway Analysis (IPA) of protein-protein interaction networks*

535 We selected the closest gene to 1,413 variants (131 genes) with Hutterite linkage disequilibrium  
536 (LD)  $r^2 > 0.8$  with the 108 mbQTLs ( $q < 0.10$ ). To interrogate and visualize network associations,  
537 we used the Ingenuity Pathway Analysis Knowledge Base (IPA®, QIAGEN Redwood City, CA),  
538 limiting interactions to primary cells or tissues. The network scores generated by IPA are based  
539 on a right-tailed Fisher's Exact test comparing the observed and expected mbQTL genes  
540 present in a pathway relative to the IPA database.

541

542 **DATA ACCESS**

543 Submission to dbGaP is currently in progress.

544

545 **DISCLOSURE DECLARATION**

546 The protocol was approved by the University of Chicago IRB (protocol 09-354-A). Written  
547 informed consent was obtained from all adult participants and the parents of minors. In addition,  
548 written assent was obtained from minor participants.

549

550 **ACKNOWLEDGEMENTS**

551 We would like to thank members of the Hutterite community for their continuous participation in  
552 our studies. We would also acknowledge members of the Ober, Gilbert and Gilad labs for useful  
553 discussions; Sally Cain and Rebecca Anderson for assistance with sample collection; Amy  
554 Mitrano for library preparation; James Lane for technical support; and Jack Gilbert for analysis  
555 advice.

556 This work was supported by NHLBI (HL085197), the NIAID (AI106683 and AI095230), NIA  
557 (AG036762) and the AAAAI (Allergy, Asthma, and Immunology Education, and Research Trust  
558 award). C.I. was supported by National Institutes of Health Grant T32 GM007197 and by the  
559 Ruth L. Kirschstein National Research Service Award (HL123289).

560

## 561 **AUTHOR CONTRIBUTIONS**

562 CO, JP and ED collected samples. ED generated sequencing libraries. CI, YG, DN, CO and JP  
563 designed the study and performed analyses. CI, CO and JP and wrote the manuscript. All  
564 authors discussed results and approved the manuscript.

565

## 566 **REFERENCES**

- 567 Aagaard K, Petrosino J, Keitel W, Watson M, Katancik J, Garcia N, Patel S, Cutting M, Madden  
568 T, Hamilton H, et al. 2013. The Human Microbiome Project strategy for comprehensive  
569 sampling of the human microbiome and why it matters. *FASEB J* **27**: 1012–1022.
- 570 Adzhubei IA, Schmidt S, Peshkin L, Ramensky VE, Gerasimova A, Bork P, Kondrashov AS,  
571 Sunyaev SR. 2010. A method and server for predicting damaging missense mutations. *Nat*  
572 *Methods* **7**: 248–249.
- 573 Arrieta M-C, Stiemsma LT, Amenyogbe N, Brown EM, Finlay B. 2014. The Intestinal  
574 Microbiome in Early Life: Health and Disease. *Frontiers in Immunology* **5**: 355.
- 575 Benson AK, Kelly SA, Legge R, Ma F, Low SJ, Kim J, Zhang M, Oh PL, Nehrenberg D, Hua K,  
576 et al. 2010. Individuality in gut microbiota composition is a complex polygenic trait shaped  
577 by multiple environmental and host genetic factors. *Proceedings of the National Academy of*  
578 *Sciences* **107**: 18933–18938.
- 579 Biesbroek G, Bosch AATM, Wang X, Keijser BJB, Veenhoven RH, Sanders EAM, Bogaert D.  
580 2014. The Impact of Breastfeeding on Nasopharyngeal Microbial Communities in Infants.

- 581 *Am J Respir Crit Care Med* **190**: 298–308.
- 582 Blekhman R, Goodrich JK, Huang K, Sun Q, Bukowski R, Bell JT, Spector TD, Keinan A, Ley  
583 RE, Gevers D, et al. 2015. Host genetic variation impacts microbiome composition across  
584 human body sites. *Genome Biol* **16**: 207.
- 585 Boase S, Foreman A, Cleland E, Tan L, Melton-Kreft R, Pant H, Hu FZ, Ehrlich GD, Wormald P-  
586 J. 2013. The microbiome of chronic rhinosinusitis: culture, molecular diagnostics and biofilm  
587 detection. *BMC Infectious Diseases* **13**: 1.
- 588 Bokulich NA, Subramanian S, Faith JJ, Gevers D, Gordon JI, Knight R, Mills DA, Caporaso JG.  
589 2013. Quality-filtering vastly improves diversity estimates from Illumina amplicon  
590 sequencing. *Nat Methods* **10**: 57–59.
- 591 Bosch AATM, Biesbroek G, Trzcinski K, Sanders EAM, Bogaert D. 2013. Viral and bacterial  
592 interactions in the upper respiratory tract. *PLoS Pathog* **9**: e1003057.
- 593 Caporaso JG, Bittinger K, Bushman FD, Desantis TZ, Andersen GL, Knight R. 2010a. PyNAST:  
594 a flexible tool for aligning sequences to a template alignment. *Bioinformatics* **26**: 266–267.
- 595 Caporaso JG, Kuczynski J, Stombaugh J, Bittinger K, Bushman FD, Costello EK, Fierer N,  
596 Pena AG, Goodrich JK, Gordon JI, et al. 2010b. QIIME allows analysis of high-throughput  
597 community sequencing data. *Nat Methods* **7**: 335–336.
- 598 Caporaso JG, Lauber CL, Walters WA, Berg-Lyons D, Huntley J, Fierer N, Owens SM, Betley J,  
599 Fraser L, Bauer M, et al. 2012. Ultra-high-throughput microbial community analysis on the  
600 Illumina HiSeq and MiSeq platforms. *ISME J* **6**: 1621–1624.
- 601 Chow J, Lee SM, Shen Y, Khosravi A, Mazmanian SK. 2010. Host-bacterial symbiosis in health  
602 and disease. *Adv Immunol* **107**: 243–274.
- 603 Cusanovich DA, Billstrand C, Zhou X, Chavarria C, De Leon S, Michelini K, Pai AA, Ober C,  
604 Gilad Y. 2012. The combination of a genome-wide association study of lymphocyte count  
605 and analysis of gene expression data reveals novel asthma candidate genes. *Hum Mol*  
606 *Genet* **21**: 2111–2123.
- 607 Davenport ER, Cusanovich DA, Michelini K, Barreiro LB, Ober C, Gilad Y. 2015. Genome-Wide  
608 Association Studies of the Human Gut Microbiota ed. B.A. White. *PLoS ONE* **10**: e0140301.
- 609 Davenport ER, Mizrahi-Man O, Michelini K, Barreiro LB, Ober C, Gilad Y. 2014. Seasonal  
610 variation in human gut microbiome composition. *PLoS ONE* **9**: e90731.
- 611 Denner DR, Sangwan N, Becker JB, Hogarth DK, Oldham J, Castillo J, Sperling AI, Solway J,  
612 Naureckas ET, Gilbert JA, et al. 2015. Corticosteroid therapy and airflow obstruction  
613 influence the bronchial microbiome, which is distinct from that of bronchoalveolar lavage in  
614 asthmatic airways. *Journal of Allergy and Clinical Immunology*.
- 615 DeSantis TZ, Hugenholtz P, Larsen N, Rojas M, Brodie EL, Keller K, Huber T, Dalevi D, Hu P,  
616 Andersen GL. 2006. Greengenes, a chimera-checked 16S rRNA gene database and  
617 workbench compatible with ARB. *Appl Environ Microbiol* **72**: 5069–5072.

- 618 Dickinson RE, Dallol A, Bieche I, Krex D, Morton D, Maher ER, Latif F. 2004. Epigenetic  
619 inactivation of SLIT3 and SLIT1 genes in human cancers. *British Journal of Cancer* **91**:  
620 2071–2078.
- 621 Dickson RP, Erb-Downward JR, Huffnagle GB. 2014. The role of the bacterial microbiome in  
622 lung disease. *Expert Review of Respiratory Medicine* **7**: 245–257.
- 623 Dominguez-Bello MG, Costello EK, Contreras M, Magris M, Hidalgo G, Fierer N, Knight R. 2010.  
624 Delivery mode shapes the acquisition and structure of the initial microbiota across multiple  
625 body habitats in newborns. *Proceedings of the National Academy of Sciences* **107**: 11971–  
626 11975.
- 627 Edgar RC. 2010. Search and clustering orders of magnitude faster than BLAST. *Bioinformatics*  
628 **26**: 2460–2461.
- 629 Friedman J, Alm EJ. 2012. Inferring correlation networks from genomic survey data. ed. C. Von  
630 Mering. *PLoS Comput Biol* **8**: e1002687.
- 631 Gallo RL, Hooper LV. 2012. Epithelial antimicrobial defence of the skin and intestine. *Nat Rev*  
632 *Immunol* **12**: 503–516.
- 633 Gensollen T, Iyer SS, Kasper DL, Blumberg RS. 2016. How colonization by microbiota in early  
634 life shapes the immune system. *Science* **352**: 539–544.
- 635 Goodrich JK, Davenport ER, Beaumont M, Jackson MA, Knight R, Ober C, Spector TD, Bell JT,  
636 Clark AG, Ley RE. 2016. Genetic Determinants of the Gut Microbiome in UK Twins. *Cell*  
637 *Host Microbe* **19**: 731–743.
- 638 GTEx Consortium. 2015. Human genomics. The Genotype-Tissue Expression (GTEx) pilot  
639 analysis: multitissue gene regulation in humans. *Science* **348**: 648–660.
- 640 Hao K, Bossé Y, Nickle DC, Paré PD, Postma DS, Laviolette M, Sandford A, Hackett TL, Daley  
641 D, Hogg JC, et al. 2012. Lung eQTLs to help reveal the molecular underpinnings of asthma.  
642 *PLoS Genet* **8**: e1003029.
- 643 Hilty M, Burke C, Pedro H, Cardenas P, Bush A, Bossley C, Davies J, Ervine A, Poulter L,  
644 Pachter L, et al. 2010. Disordered microbial communities in asthmatic airways. *PLoS ONE*  
645 **5**: e8578.
- 646 Holt PG, Strickland DH, Wikström ME, Jahnsen FL. 2008. Regulation of immunological  
647 homeostasis in the respiratory tract. *Nat Rev Immunol* **8**: 142–152.
- 648 Hooper LV, Macpherson AJ. 2010. Immune adaptations that maintain homeostasis with the  
649 intestinal microbiota. *Nat Rev Immunol* **10**: 159–169.
- 650 Hu D, Zhang D, Zheng S, Guo M, Lin X, Jiang Y. 2016. Association of Ulcerative Colitis with  
651 FUT2 and FUT3 Polymorphisms in Patients from Southeast China ed. G. Bamias. *PLoS*  
652 *ONE* **11**: e0146557.
- 653 Hu D-Y, Shao X-X, Xu C-L, Xia S-L, Yu L-Q, Jiang L-J, Jin J, Lin X-Q, Jiang Y. 2014.  
654 Associations of FUT2 and FUT3 gene polymorphisms with Crohn's disease in Chinese

- 655 patients. *J Gastroenterol Hepatol* **29**: 1778–1785.
- 656 Huang YJ, Nelson CE, Brodie EL, Desantis TZ, Baek MS, Liu J, Woyke T, Allgaier M, Bristow J,  
657 Wiener-Kronish JP, et al. 2011. Airway microbiota and bronchial hyperresponsiveness in  
658 patients with suboptimally controlled asthma. *J Allergy Clin Immunol* **127**: 372–381.e1–3.
- 659 Human Microbiome Project Consortium. 2012. Structure, function and diversity of the healthy  
660 human microbiome. *Nature* **486**: 207–214.
- 661 Kashyap DR, Wang M, Liu L-H, Boons G-J, Gupta D, Dziarski R. 2011. Peptidoglycan  
662 recognition proteins kill bacteria by activating protein-sensing two-component systems. *Nat*  
663 *Med* **17**: 676–683.
- 664 Kircher M, Witten DM, Jain P, O’Roak BJ, Cooper GM, Shendure J. 2014. A general framework  
665 for estimating the relative pathogenicity of human genetic variants. *Nat Genet* **46**: 310–315.
- 666 Knights D, Silverberg MS, Weersma RK, Gevers D, Dijkstra G, Huang H, Tyler AD, van  
667 Sommeren S, Imhann F, Stempak JM, et al. 2014. Complex host genetics influence the  
668 microbiome in inflammatory bowel disease. *Genome Med* **6**: 107.
- 669 Kretz M, Siprashvili Z, Chu C, Webster DE, Zehnder A, Qu K, Lee CS, Flockhart RJ, Groff AF,  
670 Chow J, et al. 2013. Control of somatic tissue differentiation by the long non-coding RNA  
671 TINCR. *Nature* **493**: 231–235.
- 672 Lax S, Smith DP, Hampton-Marcell J, Owens SM, Handley KM, Scott NM, Gibbons SM, Larsen  
673 P, Shogan BD, Weiss S, et al. 2014. Longitudinal analysis of microbial interaction between  
674 humans and the indoor environment. *Science* **345**: 1048–1052.
- 675 Livne OE, Han L, Alkorta-Aranburu G, Wentworth-Sheilds W, Abney M, Ober C, Nicolae DL.  
676 2015. PRIMAL: Fast and accurate pedigree-based imputation from sequence data in a  
677 founder population. ed. A.C. McHardy. *PLoS Comput Biol* **11**: e1004139.
- 678 Macpherson AJ, McCoy KD, Johansen F-E, Brandtzaeg P. 2008. The immune geography of IgA  
679 induction and function. *Mucosal Immunol* **1**: 11–22.
- 680 Malhotra N, Kang J. 2013. SMAD regulatory networks construct a balanced immune system.  
681 *Immunology* **139**: 1–10.
- 682 Mantis NJ, Forbes SJ. 2010. Secretory IgA: Arresting Microbial Pathogens at Epithelial Borders.  
683 *Immunol Invest* **39**: 383–406.
- 684 Marsland BJ, Gollwitzer ES. 2014. Host-microorganism interactions in lung diseases. *Nat Rev*  
685 *Immunol* **14**: 827–835.
- 686 McKnite AM, Perez-Munoz ME, Lu L, Williams EG, Brewer S, Andreux PA, Bastiaansen JWM,  
687 Wang X, Kachman SD, Auwerx J, et al. 2012. Murine Gut Microbiota Is Defined by Host  
688 Genetics and Modulates Variation of Metabolic Traits ed. B.A. White. *PLoS ONE* **7**: e39191.
- 689 McMurdie PJ, Holmes S. 2013. phyloseq: An R Package for Reproducible Interactive Analysis  
690 and Graphics of Microbiome Census Data ed. M. Watson. *PLoS ONE* **8**: e61217.

- 691 Morris A, Beck JM, Schloss PD, Campbell TB, Crothers K, Curtis JL, Flores SC, Fontenot AP,  
692 Ghedin E, Huang L, et al. 2013. Comparison of the respiratory microbiome in healthy  
693 nonsmokers and smokers. *Am J Respir Crit Care Med* **187**: 1067–1075.
- 694 Ng ACY, Eisenberg JM, Heath RJW, Huett A, Robinson CM, Nau GJ, Xavier RJ. 2011. Human  
695 leucine-rich repeat proteins: a genome-wide bioinformatic categorization and functional  
696 analysis in innate immunity. *Proceedings of the National Academy of Sciences* **108**: 4631–  
697 4638.
- 698 Nicholson JK, Holmes E, Kinross J, Burcelin R, Gibson G, Jia W, Pettersson S. 2012. Host-Gut  
699 Microbiota Metabolic Interactions. *Science* **336**: 1262–1267.
- 700 Noverr MC, Noggle RM, Toews GB, Huffnagle GB. 2004. Role of Antibiotics and Fungal  
701 Microbiota in Driving Pulmonary Allergic Responses. *Infection and Immunity* **72**: 4996–5003.
- 702 Ober C, Abney M, McPeck MS. 2001. The genetic dissection of complex traits in a founder  
703 population. *Am J Hum Genet* **69**: 1068–1079.
- 704 Ober C, Tan Z, Sun Y, Possick JD, Pan L, Nicolae R, Radford S, Parry RR, Heinzmann A,  
705 Deichmann KA, et al. 2008. Effect of variation in CHI3L1 on serum YKL-40 level, risk of  
706 asthma, and lung function. *N Engl J Med* **358**: 1682–1691.
- 707 Org E, Parks BW, Joo JWJ, Emert B, Schwartzman W, Kang EY, Mehrabian M, Pan C, Knight  
708 R, Gunsalus R, et al. 2015. Genetic and environmental control of host-gut microbiota  
709 interactions. *Genome Res* **25**: 1558–1569.
- 710 Pasculle AW, Muto C, Tasota F, Krystofiak S. 2008. Collection of Nasopharyngeal Swabs for  
711 Viral Culture or PCR. *University of Pittsburgh Medical Center*.
- 712 Pragman AA, Kim HB, Reilly CS, Wendt C. 2012. The lung microbiome in moderate and severe  
713 chronic obstructive pulmonary disease. *PLoS ONE*.
- 714 Purcell S, Neale B, Todd-Brown K, Thomas L, Ferreira MAR, Bender D, Maller J, Sklar P, de  
715 Bakker PIW, Daly MJ, et al. 2007. PLINK: a tool set for whole-genome association and  
716 population-based linkage analyses. *Am J Hum Genet* **81**: 559–575.
- 717 Rausch P, Rehman A, Kunzel S, Hasler R, Ott SJ, Schreiber S, Rosenstiel P, Franke A, Baines  
718 JF. 2011. Colonic mucosa-associated microbiota is influenced by an interaction of Crohn  
719 disease and FUT2 (Secretor) genotype. *Proceedings of the National Academy of Sciences*  
720 **108**: 19030–19035.
- 721 Royet J, Gupta D, Dziarski R. 2011. Peptidoglycan recognition proteins: modulators of the  
722 microbiome and inflammation. *Nat Rev Immunol* **11**: 837–851.
- 723 Salzman NH, Hung K, Haribhai D, Chu H, Karlsson-Sjöberg J, Amir E, Tegatz P, Barman M,  
724 Hayward M, Eastwood D, et al. 2010. Enteric defensins are essential regulators of intestinal  
725 microbial ecology. *Nat Immunol* **11**: 76–83.
- 726 Srinivas G, Möller S, Wang J, Kunzel S, Zillikens D, Baines JF, Ibrahim SM. 2013. Genome-  
727 wide mapping of gene–microbiota interactions in susceptibility to autoimmune skin blistering.  
728 *Nat Commun* **4**.



- 729 Suárez-Arrabal MC, Mella C, Lopez SM, Brown NV, Hall MW, Hammond S, Shiels W, Groner J,  
730 Marcon M, Ramilo O, et al. 2015. Nasopharyngeal bacterial burden and antibiotics:  
731 Influence on inflammatory markers and disease severity in infants with respiratory syncytial  
732 virus bronchiolitis. *Journal of Infection* **71**: 458–469.
- 733 Tanno T, Fujiwara A, Sakaguchi K, Tanaka K, Takenaka S, Tsuyama S. 2007. Slit3 regulates  
734 cell motility through Rac/Cdc42 activation in lipopolysaccharide-stimulated macrophages.  
735 *FEBS Letters* **581**: 1022–1026.
- 736 Taylor-Cousar JL, Zariwala MA, Burch LH, Pace RG, Drumm ML, Calloway H, Fan H, Weston  
737 BW, Wright FA, Knowles MR, et al. 2009. Histo-blood group gene polymorphisms as  
738 potential genetic modifiers of infection and cystic fibrosis lung disease severity. ed. A.E.  
739 Toland. *PLoS ONE* **4**: e4270.
- 740 Tims S, Derom C, Jonkers DM, Vlietinck R, Saris WH, Kleerebezem M, de Vos WM, Zoetendal  
741 EG. 2013. Microbiota conservation and BMI signatures in adult monozygotic twins. *ISME J*  
742 **7**: 707–717.
- 743 Toulza E, Mattiuzzo NR, Galliano M-F, Jonca N, Dossat C, Jacob D, de Daruvar A, Wincker P,  
744 Serre G, Guerrin M. 2007. Large-scale identification of human genes implicated in  
745 epidermal barrier function. *Genome Biol* **8**: R107.
- 746 Turnbaugh PJ, Hamady M, Yatsunencko T, Cantarel BL, Duncan A, Ley RE, Sogin ML, Jones  
747 WJ, Roe BA, Affourtit JP, et al. 2009. A core gut microbiome in obese and lean twins.  
748 *Nature* **457**: 480–484.
- 749 Wacklin P, Mäkivuokko H, Alakulppi N, Nikkilä J, Tenkanen H, Råbinä J, Partanen J, Aranko K,  
750 Mättö J. 2011. Secretor Genotype (FUT2 gene) Is Strongly Associated with the Composition  
751 of Bifidobacteria in the Human Intestine ed. M. Otto. *PLoS ONE* **6**: e20113.
- 752 Yamamoto F, Cid E, Yamamoto M, Saitou N, Bertranpetit J, Blancher A. 2014. An integrative  
753 evolution theory of histo-blood group ABO and related genes. *Sci Rep* **4**: 6601.
- 754 Yang C, Pring M, Wear MA, Huang M, Cooper JA, Svitkina TM, Zigmond SH. 2005. Mammalian  
755 CARMIL inhibits actin filament capping by capping protein. *Dev Cell* **9**: 209–221.
- 756 Yao T-C, Du G, Han L, Sun Y, Hu D, Yang JJ, Mathias R, Roth LA, Rafaels N, Thompson EE,  
757 et al. 2014. Genome-wide association study of lung function phenotypes in a founder  
758 population. *J Allergy Clin Immunol* **133**: 248–55.e1–10.
- 759 Yatsunencko T, Rey FE, Manary MJ, Trehan I, Dominguez-Bello MG, Contreras M, Magris M,  
760 Hidalgo G, Baldassano RN, Anokhin AP, et al. 2012. Human gut microbiome viewed across  
761 age and geography. *Nature* **486**: 222–227.
- 762 Zhou X, Stephens M. 2012. Genome-wide efficient mixed-model analysis for association studies.  
763 *Nat Genet* **44**: 821–824.
- 764

**Table 2: QTL mapping results of nasal microbiome relative abundance. A. Nasal vestibule.** 14 host variants were associated at a  $q < 0.05$  with the relative abundance of 10 genera. rs111354832 is associated with an unclassified genus of family Micrococcaceae in the summer and in the combined sample. **B. Nasopharynx.** 23 host variants were associated at a  $q < 0.05$  with the relative abundance of 14 genera. At this site 2 SNPs (rs1653301 and rs7702475) are associated with more than one bacterium. rsIDs presented for dbSNP142. Alleles presented as minor/major. Direction of effect is presented for the minor allele. When genus level is unclassified, highest classified taxonomic level is bolded. RA, relative abundance; Chr, chromosome.

### A. Nasal Vestibule

| Bacteria genus (phylum/class/order/family)                                                    | Mean RA              | rsID        | Chr | Start     | Alleles | Gene(s)                      | p                     | q     | Beta  |
|-----------------------------------------------------------------------------------------------|----------------------|-------------|-----|-----------|---------|------------------------------|-----------------------|-------|-------|
| <b>Summer</b>                                                                                 |                      |             |     |           |         |                              |                       |       |       |
| <i>Dermaococcus</i><br>(Actinobacteria/Actinobacteria/Actinomycetales/Dermaococcaceae)        | 7.9X10 <sup>-5</sup> | rs67386870  | 5   | 126156219 | A/C     | <i>LMNB1</i>                 | 2.46X10 <sup>-7</sup> | 0.016 | -1.10 |
|                                                                                               |                      | rs77536542  | 5   | 168583325 | G/A     | <i>SLIT3</i>                 | 6.35X10 <sup>-8</sup> | 0.005 | -1.27 |
|                                                                                               |                      | rs117042385 | 19  | 5530692   | T/C     | <i>ZNRF4, TINCR</i>          | 1.61X10 <sup>-8</sup> | 0.002 | -1.16 |
|                                                                                               |                      | rs28362459  | 19  | 5844792   | A/C     | <i>FUT3</i>                  | 9.47X10 <sup>-7</sup> | 0.047 | -0.81 |
| Unclassified genus<br>(Actinobacteria/Actinobacteria/Actinomycetales/ <b>Micrococcaceae</b> ) | 4.1X10 <sup>-4</sup> | rs111354832 | 4   | 7136504   | -/CAT   | <i>FLJ36777, SORCS2</i>      | 5.99X10 <sup>-8</sup> | 0.015 | -0.74 |
| <b>Winter</b>                                                                                 |                      |             |     |           |         |                              |                       |       |       |
| <i>Kocuria</i><br>(Actinobacteria/Actinobacteria/Actinomycetales/Micrococcaceae)              | 5.2X10 <sup>-4</sup> | rs12713689  | 2   | 70427457  | G/A     | <i>C2orf42, TIA1</i>         | 2.10X10 <sup>-8</sup> | 0.005 | -0.91 |
| <i>Aerococcus</i> (Firmicutes/Bacilli/Lactobacillales/Aerococcaceae)                          | 2.2X10 <sup>-4</sup> | rs10505338  | 8   | 119755490 | A/G     | <i>SAMD12-AS1, TNFRSF11B</i> | 2.02X10 <sup>-7</sup> | 0.038 | -0.81 |
| <i>Lactobacillus</i> (Firmicutes/Bacilli/Lactobacillales/Lactobacillaceae)                    | 1.4X10 <sup>-3</sup> | rs4142162   | 13  | 81127842  | G/A     | <i>SPRY2, LINC00377</i>      | 1.45X10 <sup>-7</sup> | 0.017 | -0.77 |
| <b>Combined</b>                                                                               |                      |             |     |           |         |                              |                       |       |       |



|                                                                                                   |                      |             |    |           |       |                             |                       |       |       |
|---------------------------------------------------------------------------------------------------|----------------------|-------------|----|-----------|-------|-----------------------------|-----------------------|-------|-------|
| Unclassified genus<br>(Actinobacteria/Actinobacteria/Actinomycetales/ <b>Intrasporangiaceae</b> ) | 9.2X10 <sup>-5</sup> | rs11085969  | 19 | 15792546  | A/G   | <i>CYP4F12</i>              | 5.84X10 <sup>-8</sup> | 0.005 | -0.91 |
| <b>Microbispora</b><br>(Actinobacteria/Actinobacteria/Actinomycetales/Micrococcaceae)             | 5.5X10 <sup>-4</sup> | rs2891405   | 12 | 113152097 | G/A   | <i>MIR1302-1,<br/>RPH3A</i> | 1.50X10 <sup>-7</sup> | 0.038 | -0.81 |
| Unclassified genus<br>(Actinobacteria/Actinobacteria/Actinomycetales/ <b>Micrococcaceae</b> )     | 3.5X10 <sup>-4</sup> | rs111354832 | 4  | 7136504   | -/CAT | <i>FLJ36777,<br/>SORCS2</i> | 3.45X10 <sup>-8</sup> | 0.017 | -0.77 |
| <b>Peptoniphilus</b> (Firmicutes/Clostridia/Clostridiales/Tissierellaceae)                        | 8.9X10 <sup>-5</sup> | rs9865782   | 3  | 113652774 | A/G   | <i>GRAMD1C</i>              | 1.17X10 <sup>-7</sup> | 0.005 | -0.91 |
| <b>Paracoccus</b><br>(Proteobacteria/Alphaproteobacteria/Rhodobacterales/Rhodobacteraceae)        | 6.5X10 <sup>-5</sup> | rs9953410   | 18 | 29532946  | C/A   | <i>TRAPPC8,<br/>RNF125</i>  | 2.21X10 <sup>-7</sup> | 0.038 | -0.81 |
| <b>Enterobacter</b><br>(Proteobacteria/Gammaproteobacteria/Enterobacteriales/Enterobacteriaceae)  | 6.4X10 <sup>-5</sup> | rs11042877  | 11 | 10576232  | A/C   | <i>MRVI1-AS1</i>            | 3.86X10 <sup>-7</sup> | 0.017 | -0.77 |
|                                                                                                   |                      | rs12446497  | 16 | 7341674   | A/G   | <i>RBFOX1</i>               | 5.84X10 <sup>-7</sup> | 0.005 | -0.91 |

## B. Nasopharynx

| Bacteria species (phylum/class/order/family)                                                         | Mean RA              | rsID       | Chr | Start     | Alleles | Gene(s)                       | p                     | q     | Beta  |
|------------------------------------------------------------------------------------------------------|----------------------|------------|-----|-----------|---------|-------------------------------|-----------------------|-------|-------|
| <b>Summer</b>                                                                                        |                      |            |     |           |         |                               |                       |       |       |
| <b>Aerococcus</b> (Firmicutes/Bacilli/Lactobacillales/Aerococcaceae)                                 | 6.5X10 <sup>-4</sup> | rs7702475  | 5   | 58088523  | A/G     | <i>RAB3C</i>                  | 3.97X10 <sup>-8</sup> | 0.010 | 0.77  |
| Unclassified genus (Firmicutes/Bacilli/Lactobacillales/ <b>Aerococcaceae</b> )                       | 5.3X10 <sup>-4</sup> | rs11888528 | 2   | 120118764 | C/T     | <i>C2orf76</i>                | 1.43X10 <sup>-7</sup> | 0.038 | 0.79  |
| <b>Methylobacterium</b><br>(Proteobacteria/Alphaproteobacteria/Rhizobiales/Methylobacteriaceae)      | 4.3X10 <sup>-4</sup> | rs308961   | 3   | 12150014  | T/G     | <i>SYN2</i>                   | 8.12X10 <sup>-7</sup> | 0.034 | -0.70 |
|                                                                                                      |                      | rs10547084 | 4   | 37753111  | -/TCTC  | <i>RELL1,PGM2</i>             | 4.93X10 <sup>-7</sup> | 0.031 | 0.77  |
|                                                                                                      |                      | rs67737950 | 4   | 40260058  | G/C     | <i>RHOH,<br/>LOC101060498</i> | 2.73X10 <sup>-7</sup> | 0.023 | 0.85  |
|                                                                                                      |                      | rs7702475  | 5   | 58088523  | A/G     | <i>RAB3C</i>                  | 2.46X10 <sup>-7</sup> | 0.023 | 0.77  |
|                                                                                                      |                      | rs1278260  | 10  | 127731197 | C/A     | <i>ADAM12</i>                 | 6.21X10 <sup>-7</sup> | 0.031 | 0.95  |
| Unclassified genus<br>(Proteobacteria/Alphaproteobacteria/Caulobacterales/ <b>Caulobacteraceae</b> ) | 8.5X10 <sup>-4</sup> | rs927984   | 6   | 25412987  | T/C     | <i>LRRC16A</i>                | 2.78X10 <sup>-7</sup> | 0.036 | 0.94  |
|                                                                                                      |                      | rs1543603  | 6   | 25413922  | A/G     | <i>LRRC16A</i>                | 2.30X10 <sup>-8</sup> | 0.006 | 0.88  |
| <b>Winter</b>                                                                                        |                      |            |     |           |         |                               |                       |       |       |
| <b>Mycobacterium</b><br>(Actinobacteria/Actinobacteria/Actinomycetales/Mycobacteriaceae)             | 2.2X10 <sup>-4</sup> | rs1802665  | 10  | 61788623  | G/T     | <i>ANK3</i>                   | 8.73X10 <sup>-8</sup> | 0.007 | -0.98 |
| <b>Gemella</b> (Firmicutes/Bacilli/Gemellales/Gemellaceae)                                           | 3.7X10 <sup>-4</sup> | rs17631306 | 1   | 111072322 | A/G     | <i>KCNA10,<br/>KCNA2</i>      | 2.94X10 <sup>-8</sup> | 0.008 | 1.27  |

|                                                                                                        |                      |            |    |           |     |                         |                       |       |       |
|--------------------------------------------------------------------------------------------------------|----------------------|------------|----|-----------|-----|-------------------------|-----------------------|-------|-------|
| Unclassified genus (Firmicutes/Bacilli/ <b>Lactobacillales</b> )                                       | 5.7X10 <sup>-4</sup> | rs1153741  | 2  | 182860422 | G/A | <i>PPP1R1C</i>          | 1.52X10 <sup>-7</sup> | 0.039 | -0.83 |
| <b>Combined</b>                                                                                        |                      |            |    |           |     |                         |                       |       |       |
| <b>Gordonia</b><br>(Actinobacteria/Actinobacteria/Actinomycetales/Gordoniaceae)                        | 1.1X10 <sup>-4</sup> | rs61925863 | 12 | 66694722  | C/G | <i>IRAK3, HELB</i>      | 2.88X10 <sup>-7</sup> | 0.038 | -0.90 |
|                                                                                                        |                      | rs12435212 | 14 | 85483485  | G/T | <i>NONE, LINC00911</i>  | 1.93X10 <sup>-8</sup> | 0.005 | 0.88  |
| Unclassified genus (Firmicutes/Clostridia/Clostridiales/ <b>Clostridiaceae</b> )                       | 1.0X10 <sup>-2</sup> | rs9661504  | 1  | 205915667 | A/T | <i>SLC26A9, FAM72C</i>  | 4.16X10 <sup>-7</sup> | 0.046 | -0.70 |
|                                                                                                        |                      | rs10232599 | 7  | 46035291  | G/A | <i>IGFBP3, TNS3</i>     | 1.14X10 <sup>-7</sup> | 0.029 | -0.67 |
| Unclassified genus (Actinobacteria/Actinobacteria/ <b>Actinomycetales</b> )                            | 1.3X10 <sup>-3</sup> | rs12156316 | 8  | 41706484  | T/C | <i>ANK1</i>             | 8.16X10 <sup>-7</sup> | 0.042 | 0.58  |
|                                                                                                        |                      | rs10901086 | 9  | 134635034 | T/C | <i>RAPGEF1, MED27</i>   | 7.05X10 <sup>-7</sup> | 0.042 | 0.89  |
|                                                                                                        |                      | rs12244238 | 10 | 6083239   | G/A | <i>IL2RA</i>            | 6.82X10 <sup>-7</sup> | 0.042 | -0.69 |
| Unclassified genus<br>(Actinobacteria/Actinobacteria/Actinomycetales/ <b>Micrococcaceae</b> )          | 5.0X10 <sup>-4</sup> | rs3006458  | 1  | 153320372 | T/G | <i>PGLYRP4</i>          | 5.10X10 <sup>-7</sup> | 0.032 | -0.75 |
|                                                                                                        |                      | rs4774283  | 15 | 58114121  | T/G | <i>GCOM1, ALDH1A2</i>   | 2.56X10 <sup>-7</sup> | 0.032 | -0.57 |
|                                                                                                        |                      | rs4814474  | 20 | 16322199  | A/C | <i>KIF16B</i>           | 9.35X10 <sup>-7</sup> | 0.040 | 0.56  |
| <b>Rhodococcus</b><br>(Actinobacteria/Actinobacteria/Actinomycetales/Nocardiaceae)                     | 6.4X10 <sup>-5</sup> | rs1653301  | 2  | 201076401 | A/G | <i>C2orf47, SPATS2L</i> | 1.45X10 <sup>-8</sup> | 0.004 | -0.82 |
| Unclassified genus<br>(Actinobacteria/Actinobacteria/Actinomycetales/ <b>Sporichthyaceae</b> )         | 1.5X10 <sup>-4</sup> | rs13128830 | 4  | 21455808  | T/C | <i>KCNIP4</i>           | 3.03X10 <sup>-7</sup> | 0.022 | 0.64  |
| Unclassified genus<br>(Proteobacteria/Alphaproteobacteria/Sphingomonadales/ <b>Sphingomonadaceae</b> ) | 5.1X10 <sup>-3</sup> | rs1653301  | 2  | 201076401 | A/G | <i>C2orf47, SPATS2L</i> | 9.48X10 <sup>-8</sup> | 0.024 | -0.80 |
